# Supplementary material
Source: PubMed Central journal article supplement (PMC4132866)

**Supporting Information**  
**For**  
**Transferring the PRIMO Coarse-Grained Force Field to the**  
**Membrane Environment: Simulations of Membrane Proteins**  
**and Helix-Helix Association**

Parimal Kar<sup>1</sup>, Srinivasa Murthy Gopal<sup>1</sup>, Yi-Ming Cheng<sup>1</sup>, Afra Panahi<sup>2</sup>, Michael Feig<sup>1,3\*</sup>

<sup>1</sup>Department of Biochemistry and Molecular Biology and <sup>3</sup>Department of Chemistry,  
Michigan State University, East Lansing, Michigan 48824, USA

<sup>2</sup>Departments of Chemistry and Biophysics, University of Michigan, Ann Arbor,  
Michigan 48109, USA

**Keywords:** Coarse-grain, implicit membrane, membrane proteins, tilt angle, helix-helix association, molecular dynamics, replica exchange.

\*Corresponding author:

Email: feig@msu.edu

Phone: +1 (517) 432-7439

Fax: +1 (517) 353-9334.

**Figure S1:** Insertion energy of the designed peptides: CHARMM/HDGB versus experimental transfer free energies of side-chain analogs from water into cyclohexane versus PRIMO-M (A); and biological hydrophobicity scale versus CHARMM/HDGB (B). The corresponding correlation coefficients ( $r$ ) are also provided. Charged residues were excluded from the scale since their insertion free energies are considerably overestimated by CHARMM/HDGB methodology

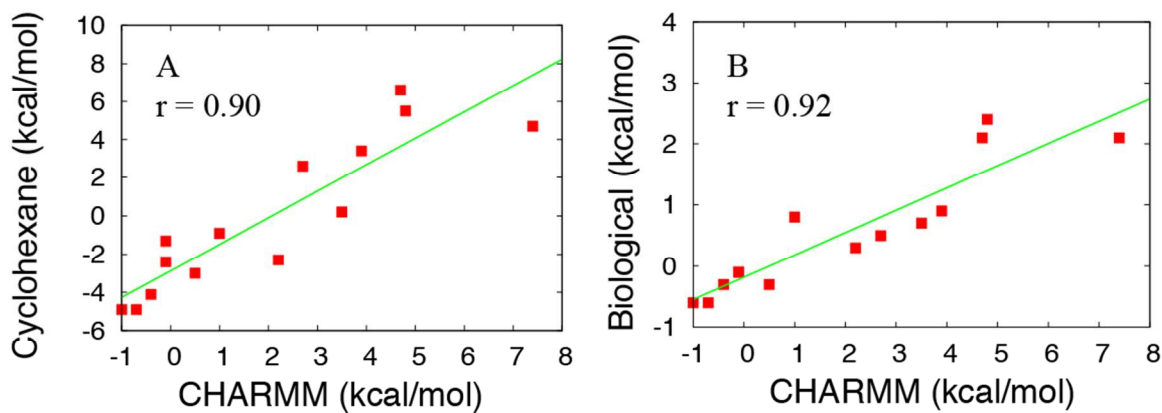

**Figure S2:** Time evolution of  $C_{\alpha}$  RMSD during PRIMO-M MD simulations with nonbonded cutoff distances of 38 Å for selected proteins from their respective crystal structure

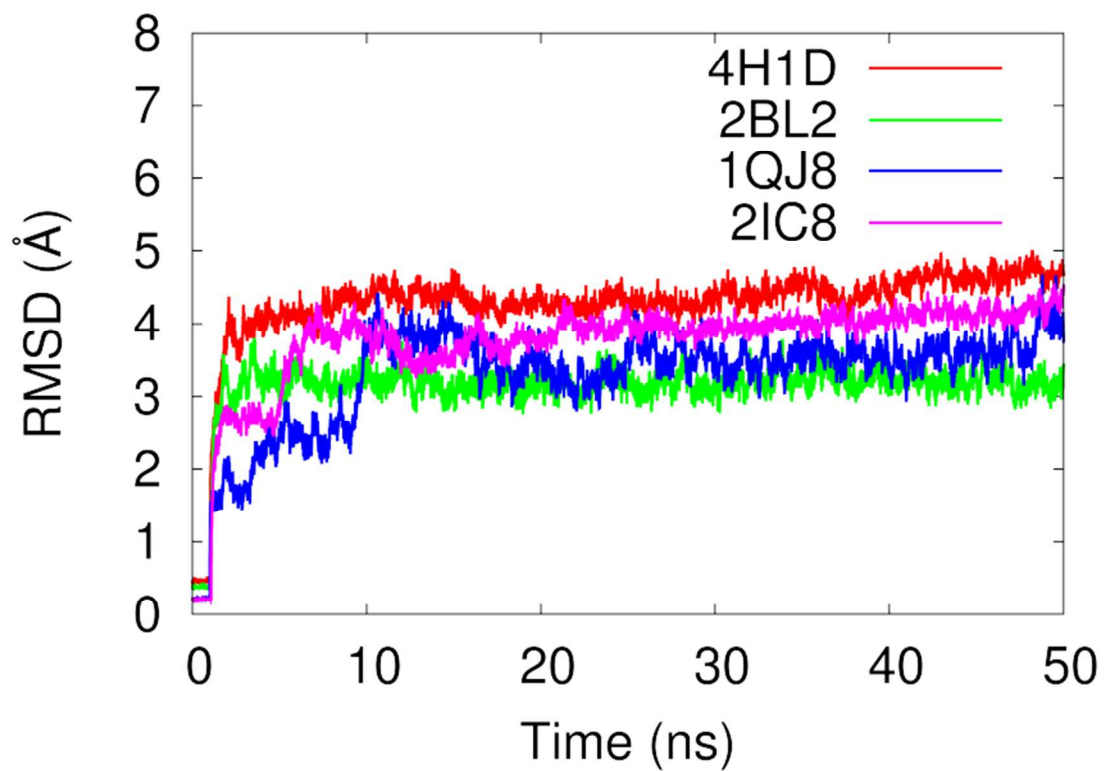

**Figure S3:** The B-factors of the  $C_\alpha$  atoms were calculated from their root-mean-square fluctuations. The red line is from the PRIMO-M simulation while the blue line is from the PRIMO simulation in aqueous environment. The green line is from the experiment.

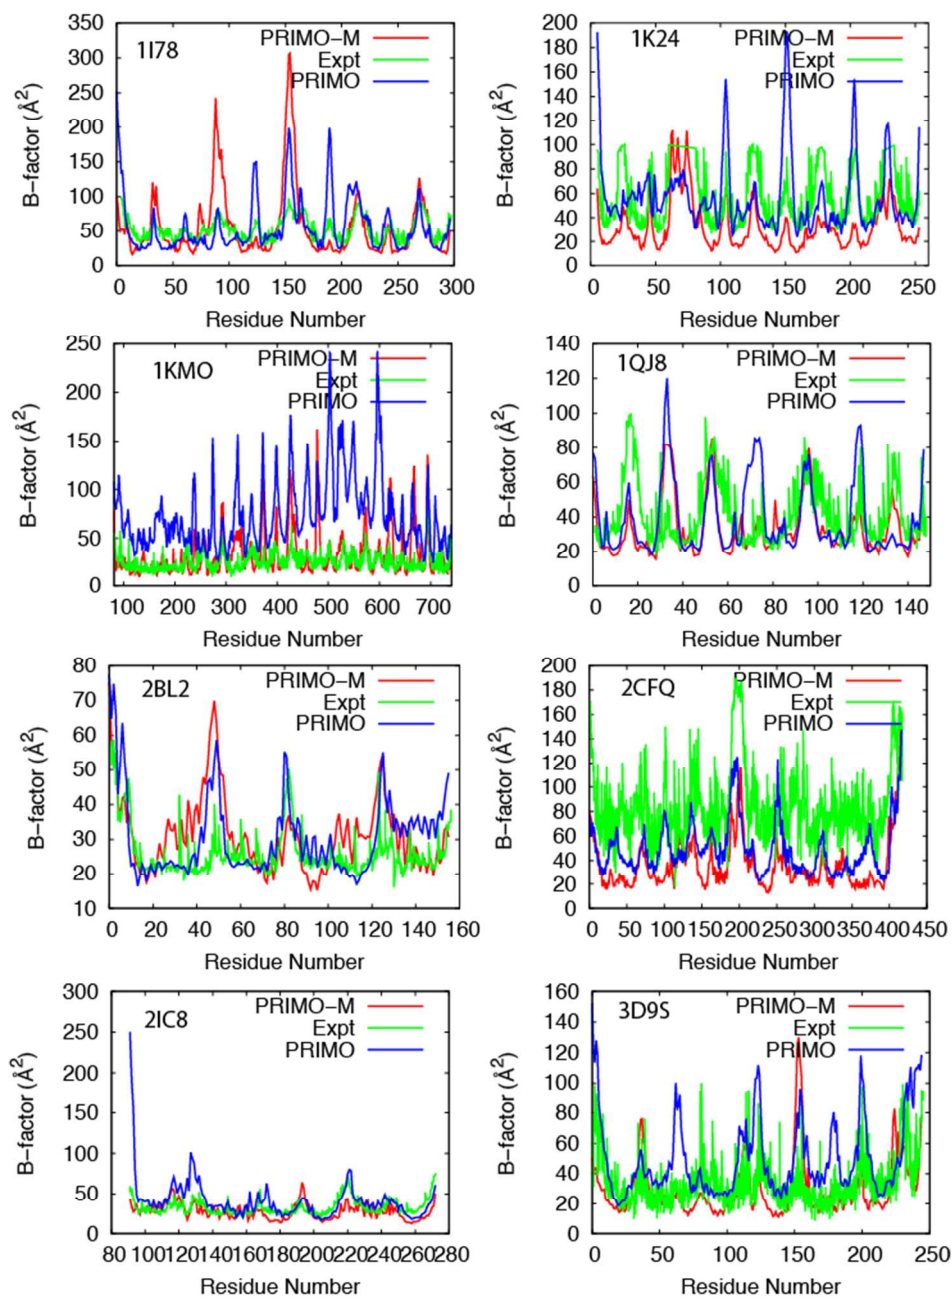

**Figure S4:** Time evolution of  $C_\alpha$  RMSD during PRIMO MD simulations in the aqueous environment for selected proteins from their respective crystal structure.

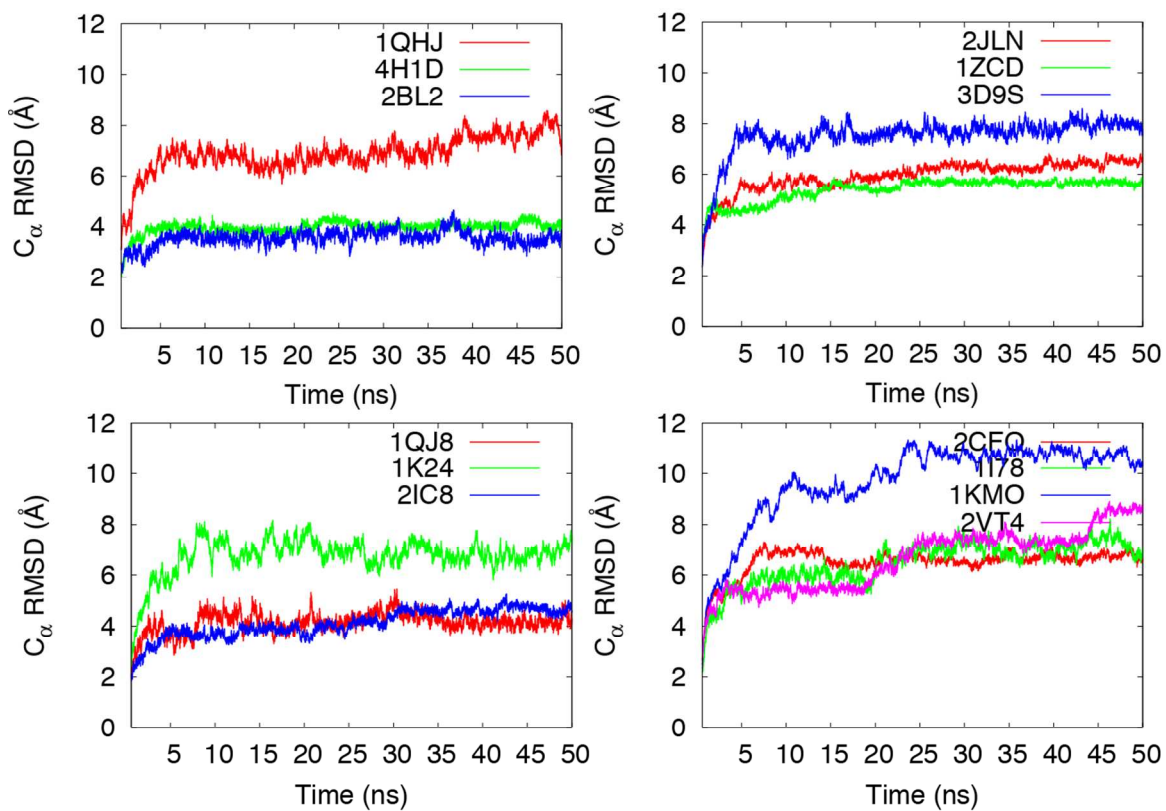

Supplement: ct500443v_si_001.pdf [file ct500443v_si_001.pdf]
